# Supplementary material for: Salinity stress-induced phosphorylation of INDETERMINATE-DOMAIN 4 (IDD4) by MPK6 regulates plant growth adaptation in Arabidopsis
Source: Front Plant Sci. 2023 Oct 10;14:1265687. doi: 10.3389/fpls.2023.1265687 (PMC10595144; doi:10.3389/fpls.2023.1265687)
Supplement: Supplementary file 4 [file Table_3.xlsx]

## Sheet: Sheet1
Table S3 IDD4 ChIP-seq targets categorized in the GO response to salt stress/ hyperosmotic salinity response
		Name	GO terms	Description
		AT5G62470	GO:0009737 response to abscisic acid stimulus	myb domain protein 96 (MYB96); CONTAINS InterPro DOMAIN/s: SANT, DNA-binding (InterPro:IPR001005), Homeodomain-like (InterPro:IPR009057), Myb, DNA-binding (InterPro:IPR014778), HTH transcriptional regulator, Myb-type, DNA-binding (InterPro:IPR017930), Homeodomain-related (InterPro:IPR012287), Myb transcription factor (InterPro:IPR015495); BEST Arabidopsis thaliana protein match is: myb domain pro…
			GO:0003700 transcription factor activity
			GO:0005634 nucleus
			GO:0009751 response to salicylic acid stimulus
			GO:0006355 regulation of transcription, DNA-dependent
			GO:0009414 response to water deprivation
			GO:0009651 response to salt stress
		AT3G05120	GO:0005737 cytoplasm	GA INSENSITIVE DWARF1A (GID1A); FUNCTIONS IN: hydrolase activity; INVOLVED IN: floral organ morphogenesis, raffinose family oligosaccharide biosynthetic process, positive regulation of gibberellic acid mediated signaling pathway, response to gibberellin stimulus, gibberellin mediated signaling pathway; LOCATED IN: nucleus, cytoplasm; EXPRESSED IN: 27 plant structures; EXPRESSED DURING: 15 growth …
			GO:0016787 hydrolase activity
			GO:0042538 hyperosmotic salinity response
			GO:0048444 floral organ morphogenesis
			GO:0010162 seed dormancy
			GO:0009863 salicylic acid mediated signaling pathway
			GO:0005634 nucleus
			GO:0009867 jasmonic acid mediated signaling pathway
			GO:0009723 response to ethylene stimulus
			GO:0010331 gibberellin binding
			GO:0009845 seed germination
			GO:0005515 protein binding
			GO:0009939 positive regulation of gibberellic acid mediated signaling pathway
			GO:0009737 response to abscisic acid stimulus
			GO:0010325 raffinose family oligosaccharide biosynthetic process
		AT2G38470	GO:0009595 detection of biotic stimulus	WRKY DNA-binding protein 33 (WRKY33); CONTAINS InterPro DOMAIN/s: DNA-binding WRKY (InterPro:IPR003657); BEST Arabidopsis thaliana protein match is: WRKY DNA-binding protein 4 (TAIR:AT1G13960.1); Has 7573 Blast hits to 4449 proteins in 326 species: Archae - 2; Bacteria - 120; Metazoa - 293; Fungi - 170; Plants - 5689; Viruses - 9; Other Eukaryotes - 1290 (source: NCBI BLink).
			GO:0000165 MAPKKK cascade
			GO:0006612 protein targeting to membrane
			GO:0010120 camalexin biosynthetic process
			GO:0031348 negative regulation of defense response
			GO:0009697 salicylic acid biosynthetic process
			GO:0042742 defense response to bacterium
			GO:0009414 response to water deprivation
			GO:0009651 response to salt stress
			GO:0010310 regulation of hydrogen peroxide metabolic process
			GO:0009862 systemic acquired resistance, salicylic acid mediated signaling pathway
			GO:0005634 nucleus
			GO:0009867 jasmonic acid mediated signaling pathway
			GO:0010508 positive regulation of autophagy
			GO:0043069 negative regulation of programmed cell death
			GO:0050832 defense response to fungus
			GO:0043900 regulation of multi-organism process
			GO:0009409 response to cold
			GO:0010200 response to chitin
			GO:0010363 regulation of plant-type hypersensitive response
			GO:0003700 transcription factor activity
			GO:0002679 respiratory burst during defense response
			GO:0006355 regulation of transcription, DNA-dependent
			GO:0005515 protein binding
			GO:0070370 cellular heat acclimation
			GO:0006944 cellular membrane fusion
		AT5G46050	GO:0043201 response to leucine	peptide transporter 3 (PTR3); FUNCTIONS IN: dipeptide transporter activity, tripeptide transporter activity, transporter activity; INVOLVED IN: in 12 processes; LOCATED IN: membrane; EXPRESSED IN: 10 plant structures; EXPRESSED DURING: LP.06 six leaves visible, LP.04 four leaves visible, 4 anthesis, C globular stage, petal differentiation and expansion stage; CONTAINS InterPro DOMAIN/s: Oligopept…
			GO:0042939 tripeptide transport
			GO:0042538 hyperosmotic salinity response
			GO:0009751 response to salicylic acid stimulus
			GO:0009753 response to jasmonic acid stimulus
			GO:0009611 response to wounding
			GO:0042936 dipeptide transporter activity
			GO:0042937 tripeptide transporter activity
			GO:0080053 response to phenylalanine
			GO:0080052 response to histidine
			GO:0042742 defense response to bacterium
			GO:0005886 plasma membrane
			GO:0009737 response to abscisic acid stimulus
			GO:0042938 dipeptide transport
		AT3G55440	GO:0048046 apoplast	triosephosphate isomerase (TPI); FUNCTIONS IN: triose-phosphate isomerase activity, copper ion binding; INVOLVED IN: in 7 processes; LOCATED IN: in 8 components; EXPRESSED IN: 27 plant structures; EXPRESSED DURING: 15 growth stages; CONTAINS InterPro DOMAIN/s: Triosephosphate isomerase, active site (InterPro:IPR020861), Aldolase-type TIM barrel (InterPro:IPR013785), Triosephosphate isomerase (Int…
			GO:0006098 pentose-phosphate shunt
			GO:0010043 response to zinc ion
			GO:0009651 response to salt stress
			GO:0006096 glycolysis
			GO:0006094 gluconeogenesis
			GO:0080129 proteasome core complex assembly
			GO:0005618 cell wall
			GO:0009570 chloroplast stroma
			GO:0005739 mitochondrion
			GO:0005774 vacuolar membrane
			GO:0046686 response to cadmium ion
			GO:0005507 copper ion binding
			GO:0018119 peptidyl-cysteine S-nitrosylation
			GO:0006833 water transport
			GO:0006972 hyperosmotic response
			GO:0009266 response to temperature stimulus
			GO:0009060 aerobic respiration
			GO:0009506 plasmodesma
			GO:0007030 Golgi organization
			GO:0004807 triose-phosphate isomerase activity
			GO:0005829 cytosol
			GO:0009853 photorespiration
			GO:0019344 cysteine biosynthetic process
			GO:0043161 proteasomal ubiquitin-dependent protein catabolic process
			GO:0051788 response to misfolded protein
		AT5G07440	GO:0006598 polyamine catabolic process	glutamate dehydrogenase 2 (GDH2); FUNCTIONS IN: in 7 functions; INVOLVED IN: response to cadmium ion, response to salt stress; LOCATED IN: mitochondrion, plasma membrane; EXPRESSED IN: 27 plant structures; EXPRESSED DURING: 16 growth stages; CONTAINS InterPro DOMAIN/s: Glutamate/phenylalanine/leucine/valine dehydrogenase (InterPro:IPR006095), Glutamate/phenylalanine/leucine/valine dehydrogenase, …
			GO:0005507 copper ion binding
			GO:0048193 Golgi vesicle transport
			GO:0042398 cellular amino acid derivative biosynthetic process
			GO:0004352 glutamate dehydrogenase activity
			GO:0050897 cobalt ion binding
			GO:0055114 oxidation reduction
			GO:0004353 glutamate dehydrogenase [NAD(P)+] activity
			GO:0005739 mitochondrion
			GO:0005524 ATP binding
			GO:0008270 zinc ion binding
			GO:0046686 response to cadmium ion
			GO:0009651 response to salt stress
			GO:0005774 vacuolar membrane
			GO:0009698 phenylpropanoid metabolic process
			GO:0046482 para-aminobenzoic acid metabolic process
			GO:0006944 cellular membrane fusion
		AT2G30520	GO:0005737 cytoplasm	ROOT PHOTOTROPISM 2 (RPT2); FUNCTIONS IN: signal transducer activity; INVOLVED IN: phototropism; LOCATED IN: nucleus; EXPRESSED IN: 22 plant structures; EXPRESSED DURING: 13 growth stages; CONTAINS InterPro DOMAIN/s: NPH3 (InterPro:IPR004249), BTB/POZ (InterPro:IPR013069), BTB/POZ fold (InterPro:IPR011333), BTB/POZ-like (InterPro:IPR000210); BEST Arabidopsis thaliana protein match is: Phototropic…
			GO:0007030 Golgi organization
			GO:0009954 proximal/distal pattern formation
			GO:0005634 nucleus
			GO:0006816 calcium ion transport
			GO:0009638 phototropism
			GO:0019344 cysteine biosynthetic process
			GO:0004871 signal transducer activity
			GO:0005886 plasma membrane
			GO:0010227 floral organ abscission
			GO:0009651 response to salt stress
			GO:0048439 flower morphogenesis
		AT3G61430	GO:0009941 chloroplast envelope	plasma membrane intrinsic protein 1A (PIP1A); FUNCTIONS IN: water channel activity; INVOLVED IN: response to water deprivation, response to salt stress, transport, water transport; LOCATED IN: mitochondrion, plasma membrane, vacuole, membrane, chloroplast envelope; EXPRESSED IN: 23 plant structures; EXPRESSED DURING: 14 growth stages; CONTAINS InterPro DOMAIN/s: Major intrinsic protein, conserved…
			GO:0009414 response to water deprivation
			GO:0009750 response to fructose stimulus
			GO:0005773 vacuole
			GO:0016021 integral to membrane
			GO:0006816 calcium ion transport
			GO:0005739 mitochondrion
			GO:0006096 glycolysis
			GO:0015250 water channel activity
			GO:0006833 water transport
			GO:0006972 hyperosmotic response
			GO:0009266 response to temperature stimulus
			GO:0046686 response to cadmium ion
			GO:0009651 response to salt stress
			GO:0007030 Golgi organization
			GO:0055085 transmembrane transport
			GO:0009506 plasmodesma
		AT4G39080	GO:0007033 vacuole organization	vacuolar proton ATPase A3 (VHA-A3); FUNCTIONS IN: ATPase activity, hydrogen-translocating pyrophosphatase activity; INVOLVED IN: cellular response to nutrient levels, ATP synthesis coupled proton transport; LOCATED IN: in 7 components; EXPRESSED IN: 26 plant structures; EXPRESSED DURING: 16 growth stages; CONTAINS InterPro DOMAIN/s: ATPase, V0/A0 complex, 116kDa subunit (InterPro:IPR002490); BEST…
			GO:0007030 Golgi organization
			GO:0031669 cellular response to nutrient levels
			GO:0016049 cell growth
			GO:0000902 cell morphogenesis
			GO:0009941 chloroplast envelope
			GO:0005794 Golgi apparatus
			GO:0048193 Golgi vesicle transport
			GO:0032119 sequestering of zinc ion
			GO:0006816 calcium ion transport
			GO:0009678 hydrogen-translocating pyrophosphatase activity
			GO:0009705 plant-type vacuole membrane
			GO:0045735 nutrient reservoir activity
			GO:0015986 ATP synthesis coupled proton transport
			GO:0043181 vacuolar sequestering
			GO:0016887 ATPase activity
			GO:0005886 plasma membrane
			GO:0009651 response to salt stress
			GO:0070072 vacuolar proton-transporting V-type ATPase complex assembly
		AT5G62350	GO:0046910 pectinesterase inhibitor activity	Plant invertase/pectin methylesterase inhibitor superfamily protein; FUNCTIONS IN: enzyme inhibitor activity, pectinesterase inhibitor activity, pectinesterase activity; INVOLVED IN: response to salt stress; LOCATED IN: endomembrane system; EXPRESSED IN: 22 plant structures; EXPRESSED DURING: 13 growth stages; CONTAINS InterPro DOMAIN/s: Pectinesterase inhibitor (InterPro:IPR006501); BEST Arabido…
			GO:0007030 Golgi organization
			GO:0030599 pectinesterase activity
			GO:0006833 water transport
			GO:0006972 hyperosmotic response
			GO:0009266 response to temperature stimulus
			GO:0046686 response to cadmium ion
			GO:0009651 response to salt stress
			GO:0006096 glycolysis
		AT4G18710	GO:0009733 response to auxin stimulus	BRASSINOSTEROID-INSENSITIVE 2 (BIN2); FUNCTIONS IN: protein kinase activity, kinase activity, glycogen synthase kinase 3 activity; INVOLVED IN: in 7 processes; LOCATED IN: plasma membrane; EXPRESSED IN: 29 plant structures; EXPRESSED DURING: 13 growth stages; CONTAINS InterPro DOMAIN/s: Protein kinase, ATP binding site (InterPro:IPR017441), Protein kinase, catalytic domain (InterPro:IPR000719), S…
			GO:0007030 Golgi organization
			GO:0048767 root hair elongation
			GO:0009729 detection of brassinosteroid stimulus
			GO:0005515 protein binding
			GO:0004674 protein serine/threonine kinase activity
			GO:0009742 brassinosteroid mediated signaling pathway
			GO:0009965 leaf morphogenesis
			GO:0009825 multidimensional cell growth
			GO:0006096 glycolysis
			GO:0046827 positive regulation of protein export from nucleus
			GO:0006833 water transport
			GO:0004713 protein tyrosine kinase activity
			GO:0006972 hyperosmotic response
			GO:0009266 response to temperature stimulus
			GO:0046686 response to cadmium ion
			GO:0009651 response to salt stress
			GO:0005886 plasma membrane
			GO:0046777 protein amino acid autophosphorylation
			GO:0005524 ATP binding
		AT1G61890	GO:0006855 multidrug transport	MATE efflux family protein; FUNCTIONS IN: antiporter activity, drug transmembrane transporter activity, transporter activity; INVOLVED IN: response to karrikin; LOCATED IN: membrane; EXPRESSED IN: 22 plant structures; EXPRESSED DURING: 13 growth stages; CONTAINS InterPro DOMAIN/s: Multi antimicrobial extrusion protein MatE (InterPro:IPR002528); BEST Arabidopsis thaliana protein match is: MATE eff…
			GO:0009737 response to abscisic acid stimulus
			GO:0010200 response to chitin
			GO:0009753 response to jasmonic acid stimulus
			GO:0016020 membrane
			GO:0015297 antiporter activity
			GO:0015238 drug transmembrane transporter activity
			GO:0009694 jasmonic acid metabolic process
			GO:0015824 proline transport
			GO:0009651 response to salt stress
			GO:0009507 chloroplast
		AT3G55730	GO:0005737 cytoplasm	myb domain protein 109 (MYB109); CONTAINS InterPro DOMAIN/s: SANT, DNA-binding (InterPro:IPR001005), Homeodomain-like (InterPro:IPR009057), Myb, DNA-binding (InterPro:IPR014778), HTH transcriptional regulator, Myb-type, DNA-binding (InterPro:IPR017930), Homeodomain-related (InterPro:IPR012287), Myb transcription factor (InterPro:IPR015495); BEST Arabidopsis thaliana protein match is: myb domain p…
			GO:0009733 response to auxin stimulus
			GO:0009751 response to salicylic acid stimulus
			GO:0009743 response to carbohydrate stimulus
			GO:0009753 response to jasmonic acid stimulus
			GO:0010090 trichome morphogenesis
			GO:0005634 nucleus
			GO:0009737 response to abscisic acid stimulus
			GO:0000303 response to superoxide
			GO:0006355 regulation of transcription, DNA-dependent
			GO:0003700 transcription factor activity
			GO:0009873 ethylene mediated signaling pathway
			GO:0009651 response to salt stress
			GO:0009739 response to gibberellin stimulus
		AT3G27240	GO:0009060 aerobic respiration	Cytochrome C1 family; FUNCTIONS IN: electron carrier activity, iron ion binding, heme binding, electron transporter, transferring electrons within CoQH2-cytochrome c reductase complex activity; LOCATED IN: in 6 components; EXPRESSED IN: 26 plant structures; EXPRESSED DURING: 15 growth stages; CONTAINS InterPro DOMAIN/s: Cytochrome c1 (InterPro:IPR002326), Cytochrome c1, transmembrane anchor, C-te…
			GO:0020037 heme binding
			GO:0009853 photorespiration
			GO:0005886 plasma membrane
			GO:0006098 pentose-phosphate shunt
			GO:0005774 vacuolar membrane
			GO:0005750 mitochondrial respiratory chain complex III
			GO:0006511 ubiquitin-dependent protein catabolic process
			GO:0080129 proteasome core complex assembly
			GO:0046686 response to cadmium ion
			GO:0009651 response to salt stress
			GO:0051788 response to misfolded protein
			GO:0045153 electron transporter, transferring electrons within CoQH2-cytochrome c reductase complex activity
			GO:0006096 glycolysis
		AT5G14640	GO:0005829 cytosol	shaggy-like kinase 13 (SK13); FUNCTIONS IN: protein serine/threonine kinase activity, protein kinase activity, ATP binding; INVOLVED IN: response to salt stress, hyperosmotic response; LOCATED IN: cytosol; EXPRESSED IN: 24 plant structures; EXPRESSED DURING: 13 growth stages; CONTAINS InterPro DOMAIN/s: Protein kinase, ATP binding site (InterPro:IPR017441), Protein kinase, catalytic domain (Inter…
			GO:0004674 protein serine/threonine kinase activity
			GO:0006972 hyperosmotic response
			GO:0009651 response to salt stress
			GO:0046777 protein amino acid autophosphorylation
			GO:0005524 ATP binding
			GO:0009507 chloroplast
		AT4G25030	GO:0009733 response to auxin stimulus	unknown protein; BEST Arabidopsis thaliana protein match is: unknown protein (TAIR:AT5G45410.3); Has 125 Blast hits to 125 proteins in 36 species: Archae - 2; Bacteria - 31; Metazoa - 0; Fungi - 4; Plants - 88; Viruses - 0; Other Eukaryotes - 0 (source: NCBI BLink).
			GO:0009738 abscisic acid mediated signaling pathway
			GO:0042538 hyperosmotic salinity response
			GO:0009753 response to jasmonic acid stimulus
			GO:0030968 endoplasmic reticulum unfolded protein response
			GO:0009805 coumarin biosynthetic process
			GO:0005634 nucleus
			GO:0006612 protein targeting to membrane
			GO:0009611 response to wounding
			GO:0009723 response to ethylene stimulus
			GO:0006944 cellular membrane fusion
			GO:0009414 response to water deprivation
			GO:0043069 negative regulation of programmed cell death
			GO:0010363 regulation of plant-type hypersensitive response
		AT2G27310	GO:0009738 abscisic acid mediated signaling pathway	F-box family protein; BEST Arabidopsis thaliana protein match is: F-box family protein (TAIR:AT2G36090.1); Has 105 Blast hits to 105 proteins in 13 species: Archae - 0; Bacteria - 0; Metazoa - 0; Fungi - 0; Plants - 105; Viruses - 0; Other Eukaryotes - 0 (source: NCBI BLink).
			GO:0042538 hyperosmotic salinity response
			GO:0010200 response to chitin
			GO:0010286 heat acclimation
			GO:0002679 respiratory burst during defense response
			GO:0009873 ethylene mediated signaling pathway
			GO:0009414 response to water deprivation
			GO:0009693 ethylene biosynthetic process
		AT2G01140	GO:0009534 chloroplast thylakoid	Aldolase superfamily protein; FUNCTIONS IN: fructose-bisphosphate aldolase activity; INVOLVED IN: response to oxidative stress, response to cadmium ion, pentose-phosphate shunt; LOCATED IN: mitochondrion, chloroplast, plastoglobule; EXPRESSED IN: 25 plant structures; EXPRESSED DURING: 15 growth stages; CONTAINS InterPro DOMAIN/s: Aldolase-type TIM barrel (InterPro:IPR013785), Fructose-bisphosphat…
			GO:0009570 chloroplast stroma
			GO:0010287 plastoglobule
			GO:0005739 mitochondrion
			GO:0006096 glycolysis
			GO:0006098 pentose-phosphate shunt
			GO:0004332 fructose-bisphosphate aldolase activity
			GO:0046686 response to cadmium ion
			GO:0009651 response to salt stress
			GO:0006979 response to oxidative stress
		AT4G27410	GO:0009733 response to auxin stimulus	RESPONSIVE TO DESICCATION 26 (RD26); CONTAINS InterPro DOMAIN/s: No apical meristem (NAM) protein (InterPro:IPR003441); BEST Arabidopsis thaliana protein match is: NAC domain containing protein 19 (TAIR:AT1G52890.1); Has 297 Blast hits to 297 proteins in 44 species: Archae - 0; Bacteria - 0; Metazoa - 0; Fungi - 0; Plants - 297; Viruses - 0; Other Eukaryotes - 0 (source: NCBI BLink).
			GO:0042538 hyperosmotic salinity response
			GO:0009753 response to jasmonic acid stimulus
			GO:0003700 transcription factor activity
			GO:0005634 nucleus
			GO:0009738 abscisic acid mediated signaling pathway
			GO:0009611 response to wounding
			GO:0009723 response to ethylene stimulus
			GO:0045893 positive regulation of transcription, DNA-dependent
			GO:0009414 response to water deprivation
			GO:0009409 response to cold
			GO:0007275 multicellular organismal development
		AT5G05170	GO:0030244 cellulose biosynthetic process	CONSTITUTIVE EXPRESSION OF VSP 1 (CEV1); FUNCTIONS IN: cellulose synthase activity, transferase activity, transferring glycosyl groups; INVOLVED IN: primary cell wall biogenesis, cellulose biosynthetic process, defense response; LOCATED IN: Golgi apparatus, plasma membrane; EXPRESSED IN: 27 plant structures; EXPRESSED DURING: 14 growth stages; CONTAINS InterPro DOMAIN/s: Cellulose synthase (Inter…
			GO:0008270 zinc ion binding
			GO:0009651 response to salt stress
			GO:0006096 glycolysis
			GO:0007389 pattern specification process
			GO:0009825 multidimensional cell growth
			GO:0009809 lignin biosynthetic process
			GO:0009750 response to fructose stimulus
			GO:0043481 anthocyanin accumulation in tissues in response to UV light
			GO:0071555 cell wall organization
			GO:0016760 cellulose synthase (UDP-forming) activity
			GO:0046686 response to cadmium ion
			GO:0009926 auxin polar transport
			GO:0016126 sterol biosynthetic process
			GO:0048767 root hair elongation
			GO:0006816 calcium ion transport
			GO:0006952 defense response
			GO:0006833 water transport
			GO:0006972 hyperosmotic response
			GO:0009266 response to temperature stimulus
			GO:0043255 regulation of carbohydrate biosynthetic process
			GO:0009506 plasmodesma
			GO:0007030 Golgi organization
			GO:0009833 primary cell wall biogenesis
			GO:0009834 secondary cell wall biogenesis
			GO:0005802 trans-Golgi network
			GO:0009932 cell tip growth
			GO:0005768 endosome
		AT4G35450	GO:0006457 protein folding	ankyrin repeat-containing protein 2 (AKR2); INVOLVED IN: in 6 processes; LOCATED IN: integral to chloroplast outer membrane, nucleus, cytoplasm; EXPRESSED IN: 25 plant structures; EXPRESSED DURING: 17 growth stages; CONTAINS InterPro DOMAIN/s: Ankyrin repeat-containing domain (InterPro:IPR020683), Ankyrin repeat (InterPro:IPR002110); BEST Arabidopsis thaliana protein match is: ankyrin repeat-cont…
			GO:0009816 defense response to bacterium, incompatible interaction
			GO:0005634 nucleus
			GO:0031359 integral to chloroplast outer membrane
			GO:0010228 vegetative to reproductive phase transition of meristem
			GO:0046686 response to cadmium ion
			GO:0009651 response to salt stress
			GO:0006096 glycolysis
			GO:0045036 protein targeting to chloroplast
			GO:0006094 gluconeogenesis
		AT1G20840	GO:0009744 response to sucrose stimulus	tonoplast monosaccharide transporter1 (TMT1); FUNCTIONS IN: carbohydrate transmembrane transporter activity, sugar:hydrogen symporter activity, nucleoside transmembrane transporter activity; INVOLVED IN: in 6 processes; LOCATED IN: plant-type vacuole membrane, plasma membrane, vacuole, membrane; EXPRESSED IN: 30 plant structures; EXPRESSED DURING: 15 growth stages; CONTAINS InterPro DOMAIN/s: Sug…
			GO:0007030 Golgi organization
			GO:0005351 sugar:hydrogen symporter activity
			GO:0009750 response to fructose stimulus
			GO:0016021 integral to membrane
			GO:0009624 response to nematode
			GO:0006816 calcium ion transport
			GO:0009749 response to glucose stimulus
			GO:0005337 nucleoside transmembrane transporter activity
			GO:0009651 response to salt stress
			GO:0009705 plant-type vacuole membrane
			GO:0055085 transmembrane transport
		AT2G05520	GO:0009751 response to salicylic acid stimulus	glycine-rich protein 3 (GRP-3); FUNCTIONS IN: molecular_function unknown; INVOLVED IN: response to ethylene stimulus, response to desiccation, response to abscisic acid stimulus, response to salicylic acid stimulus; LOCATED IN: endomembrane system; EXPRESSED IN: 22 plant structures; EXPRESSED DURING: 14 growth stages; CONTAINS InterPro DOMAIN/s: Glycine rich protein (InterPro:IPR010800); BEST Ara…
			GO:0019761 glucosinolate biosynthetic process
			GO:0009737 response to abscisic acid stimulus
			GO:0006569 tryptophan catabolic process
			GO:0009723 response to ethylene stimulus
			GO:0009409 response to cold
			GO:0019344 cysteine biosynthetic process
			GO:0009627 systemic acquired resistance
			GO:0005515 protein binding
			GO:0009269 response to desiccation
			GO:0009651 response to salt stress
			GO:0009684 indoleacetic acid biosynthetic process
			GO:0031347 regulation of defense response
			GO:0005576 extracellular region
		AT5G06980	GO:0009651 response to salt stress	unknown protein; BEST Arabidopsis thaliana protein match is: unknown protein (TAIR:AT3G12320.1); Has 30201 Blast hits to 17322 proteins in 780 species: Archae - 12; Bacteria - 1396; Metazoa - 17338; Fungi - 3422; Plants - 5037; Viruses - 0; Other Eukaryotes - 2996 (source: NCBI BLink).
			GO:0005634 nucleus
			GO:0009737 response to abscisic acid stimulus
			GO:0010264 myo-inositol hexakisphosphate biosynthetic process
		AT4G26080	GO:0006470 protein amino acid dephosphorylation	ABA INSENSITIVE 1 (ABI1); CONTAINS InterPro DOMAIN/s: Protein phosphatase 2C, manganese/magnesium aspartate binding site (InterPro:IPR000222), Protein phosphatase 2C-related (InterPro:IPR001932), Protein phosphatase 2C (InterPro:IPR015655), Protein phosphatase 2C, N-terminal (InterPro:IPR014045); BEST Arabidopsis thaliana protein match is: Protein phosphatase 2C family protein (TAIR:AT5G57050.1);…
			GO:0006612 protein targeting to membrane
			GO:0000303 response to superoxide
			GO:0031348 negative regulation of defense response
			GO:0010029 regulation of seed germination
			GO:0009414 response to water deprivation
			GO:0009733 response to auxin stimulus
			GO:0042538 hyperosmotic salinity response
			GO:0009862 systemic acquired resistance, salicylic acid mediated signaling pathway
			GO:0005634 nucleus
			GO:0000165 MAPKKK cascade
			GO:0009611 response to wounding
			GO:0009867 jasmonic acid mediated signaling pathway
			GO:0005509 calcium ion binding
			GO:0043069 negative regulation of programmed cell death
			GO:0008287 protein serine/threonine phosphatase complex
			GO:0006914 autophagy
			GO:0050832 defense response to fungus
			GO:0010119 regulation of stomatal movement
			GO:0009409 response to cold
			GO:0009408 response to heat
			GO:0009788 negative regulation of abscisic acid mediated signaling pathway
			GO:0019901 protein kinase binding
			GO:0010363 regulation of plant-type hypersensitive response
			GO:0030968 endoplasmic reticulum unfolded protein response
			GO:0004722 protein serine/threonine phosphatase activity
			GO:0009873 ethylene mediated signaling pathway
		AT5G24270	GO:0005737 cytoplasm	SALT OVERLY SENSITIVE 3 (SOS3); CONTAINS InterPro DOMAIN/s: Recoverin (InterPro:IPR001125), EF-HAND 2 (InterPro:IPR018249), Calcineurin B protein (InterPro:IPR015757), EF-hand-like domain (InterPro:IPR011992), Calcium-binding EF-hand (InterPro:IPR002048); BEST Arabidopsis thaliana protein match is: calcineurin B-like protein 8 (TAIR:AT1G64480.1); Has 1807 Blast hits to 1807 proteins in 277 specie…
			GO:0042539 hypotonic salinity response
			GO:0019722 calcium-mediated signaling
			GO:0004723 calcium-dependent protein serine/threonine phosphatase activity
			GO:0006499 N-terminal protein myristoylation
			GO:0005513 detection of calcium ion
			GO:0030007 cellular potassium ion homeostasis
			GO:0005509 calcium ion binding
			GO:0005515 protein binding
			GO:0005886 plasma membrane
			GO:0005955 calcineurin complex
			GO:0010118 stomatal movement
		AT4G26400	GO:0009733 response to auxin stimulus	RING/U-box superfamily protein; FUNCTIONS IN: zinc ion binding; INVOLVED IN: response to chitin; LOCATED IN: endomembrane system; EXPRESSED IN: 24 plant structures; EXPRESSED DURING: 15 growth stages; CONTAINS InterPro DOMAIN/s: Zinc finger, RING-type (InterPro:IPR001841), Zinc finger, C3HC4 RING-type (InterPro:IPR018957); BEST Arabidopsis thaliana protein match is: RING/U-box superfamily protein…
			GO:0009737 response to abscisic acid stimulus
			GO:0010200 response to chitin
			GO:0000303 response to superoxide
			GO:0008270 zinc ion binding
			GO:0009873 ethylene mediated signaling pathway
			GO:0009651 response to salt stress
		AT1G29330	GO:0042538 hyperosmotic salinity response	---
			GO:0005783 endoplasmic reticulum
			GO:0005801 cis-Golgi network
			GO:0006914 autophagy
			GO:0005046 KDEL sequence binding
			GO:0006621 protein retention in ER lumen
			GO:0004872 receptor activity
			GO:0009414 response to water deprivation
			GO:0015031 protein transport
			GO:0016021 integral to membrane
		AT1G53850	GO:0022626 cytosolic ribosome	20S proteasome alpha subunit E1 (PAE1); FUNCTIONS IN: peptidase activity, endopeptidase activity, threonine-type endopeptidase activity; INVOLVED IN: response to cadmium ion, ubiquitin-dependent protein catabolic process; LOCATED IN: proteasome core complex, proteasome complex, cytosolic ribosome, plasma membrane; EXPRESSED IN: 24 plant structures; EXPRESSED DURING: 13 growth stages; CONTAINS Int…
			GO:0006635 fatty acid beta-oxidation
			GO:0005774 vacuolar membrane
			GO:0005829 cytosol
			GO:0004540 ribonuclease activity
			GO:0005634 nucleus
			GO:0004298 threonine-type endopeptidase activity
			GO:0046686 response to cadmium ion
			GO:0006094 gluconeogenesis
			GO:0043248 proteasome assembly
			GO:0005886 plasma membrane
			GO:0019773 proteasome core complex, alpha-subunit complex
			GO:0006096 glycolysis
			GO:0009651 response to salt stress
			GO:0051788 response to misfolded protein
			GO:0010388 cullin deneddylation
			GO:0043161 proteasomal ubiquitin-dependent protein catabolic process
			GO:0009640 photomorphogenesis
		AT3G13920	GO:0008026 ATP-dependent helicase activity	eukaryotic translation initiation factor 4A1 (EIF4A1); FUNCTIONS IN: protein binding, ATP-dependent helicase activity, translation initiation factor activity; INVOLVED IN: response to cadmium ion, translational initiation; LOCATED IN: cytosol, nucleolus, cell wall, membrane; EXPRESSED IN: 24 plant structures; EXPRESSED DURING: 16 growth stages; CONTAINS InterPro DOMAIN/s: RNA helicase, DEAD-box t…
			GO:0005730 nucleolus
			GO:0005618 cell wall
			GO:0005829 cytosol
			GO:0048046 apoplast
			GO:0009506 plasmodesma
			GO:0005515 protein binding
			GO:0046686 response to cadmium ion
			GO:0009651 response to salt stress
			GO:0006094 gluconeogenesis
			GO:0006413 translational initiation
			GO:0006096 glycolysis
			GO:0005524 ATP binding
			GO:0003743 translation initiation factor activity
		AT5G04140	GO:0048046 apoplast	glutamate synthase 1 (GLU1); FUNCTIONS IN: protein binding, glutamate synthase (ferredoxin) activity; INVOLVED IN: positive regulation of glycine hydroxymethyltransferase activity, response to light stimulus, photorespiration; LOCATED IN: in 6 components; EXPRESSED IN: 26 plant structures; EXPRESSED DURING: 14 growth stages; CONTAINS InterPro DOMAIN/s: Glutamine amidotransferase, class-II (InterP…
			GO:0009697 salicylic acid biosynthetic process
			GO:0005739 mitochondrion
			GO:0048481 ovule development
			GO:0009651 response to salt stress
			GO:0010103 stomatal complex morphogenesis
			GO:0009941 chloroplast envelope
			GO:0010114 response to red light
			GO:0009750 response to fructose stimulus
			GO:0009570 chloroplast stroma
			GO:0019684 photosynthesis, light reaction
			GO:0016020 membrane
			GO:0016041 glutamate synthase (ferredoxin) activity
			GO:0009637 response to blue light
			GO:0010218 response to far red light
			GO:0009902 chloroplast relocation
			GO:0006833 water transport
			GO:0009409 response to cold
			GO:0010155 regulation of proton transport
			GO:0009644 response to high light intensity
			GO:0009744 response to sucrose stimulus
			GO:0080114 positive regulation of glycine hydroxymethyltransferase activity
			GO:0009814 defense response, incompatible interaction
			GO:0009853 photorespiration
			GO:0005515 protein binding
			GO:0016117 carotenoid biosynthetic process
			GO:0042742 defense response to bacterium
		AT5G11530	GO:0070734 histone H3-K27 methylation	embryonic flower 1 (EMF1); Has 1807 Blast hits to 1807 proteins in 277 species: Archae - 0; Bacteria - 0; Metazoa - 736; Fungi - 347; Plants - 385; Viruses - 0; Other Eukaryotes - 339 (source: NCBI BLink).
			GO:0042538 hyperosmotic salinity response
			GO:0006486 protein amino acid glycosylation
			GO:0005634 nucleus
			GO:0009910 negative regulation of flower development
			GO:0048367 shoot development
			GO:0045892 negative regulation of transcription, DNA-dependent
			GO:0003723 RNA binding
			GO:0005515 protein binding
			GO:0003690 double-stranded DNA binding
			GO:0003697 single-stranded DNA binding
			GO:0010022 meristem determinacy
		AT3G61440	GO:0019288 isopentenyl diphosphate biosynthetic process, mevalonate-independent pathway	cysteine synthase C1 (CYSC1); FUNCTIONS IN: cysteine synthase activity, copper ion binding, L-3-cyanoalanine synthase activity; INVOLVED IN: cysteine biosynthetic process, detoxification of nitrogen compound, cyanide metabolic process; LOCATED IN: mitochondrion, chloroplast; EXPRESSED IN: 26 plant structures; EXPRESSED DURING: 14 growth stages; CONTAINS InterPro DOMAIN/s: Cysteine synthase/cystat…
			GO:0042744 hydrogen peroxide catabolic process
			GO:0030170 pyridoxal phosphate binding
			GO:0051410 detoxification of nitrogen compound
			GO:0009651 response to salt stress
			GO:0006096 glycolysis
			GO:0032880 regulation of protein localization
			GO:0009750 response to fructose stimulus
			GO:0019500 cyanide catabolic process
			GO:0005739 mitochondrion
			GO:0046686 response to cadmium ion
			GO:0050017 L-3-cyanoalanine synthase activity
			GO:0019761 glucosinolate biosynthetic process
			GO:0004124 cysteine synthase activity
			GO:0009684 indoleacetic acid biosynthetic process
			GO:0006833 water transport
			GO:0006972 hyperosmotic response
			GO:0009266 response to temperature stimulus
			GO:0009507 chloroplast
			GO:0007030 Golgi organization
			GO:0005507 copper ion binding
			GO:0006535 cysteine biosynthetic process from serine
		AT1G27730	GO:0035264 multicellular organism growth	salt tolerance zinc finger (STZ); CONTAINS InterPro DOMAIN/s: Zinc finger, C2H2-like (InterPro:IPR015880), Zinc finger, C2H2-type (InterPro:IPR007087); BEST Arabidopsis thaliana protein match is: zinc finger of Arabidopsis thaliana 6 (TAIR:AT5G04340.1); Has 5350 Blast hits to 3982 proteins in 146 species: Archae - 0; Bacteria - 0; Metazoa - 4198; Fungi - 48; Plants - 937; Viruses - 0; Other Eukar…
			GO:0009695 jasmonic acid biosynthetic process
			GO:0008270 zinc ion binding
			GO:0009414 response to water deprivation
			GO:0015979 photosynthesis
			GO:0009733 response to auxin stimulus
			GO:0043565 sequence-specific DNA binding
			GO:0042538 hyperosmotic salinity response
			GO:0009753 response to jasmonic acid stimulus
			GO:0005634 nucleus
			GO:0009738 abscisic acid mediated signaling pathway
			GO:0009611 response to wounding
			GO:0009612 response to mechanical stimulus
			GO:0002679 respiratory burst during defense response
			GO:0045892 negative regulation of transcription, DNA-dependent
			GO:0009409 response to cold
			GO:0010117 photoprotection
			GO:0009644 response to high light intensity
			GO:0006979 response to oxidative stress
			GO:0010200 response to chitin
			GO:0003700 transcription factor activity
			GO:0009620 response to fungus
			GO:0009873 ethylene mediated signaling pathway
		AT4G18010	GO:0032957 inositol trisphosphate metabolic process	myo-inositol polyphosphate 5-phosphatase 2 (5PTASE2); CONTAINS InterPro DOMAIN/s: Inositol polyphosphate related phosphatase (InterPro:IPR000300), Endonuclease/exonuclease/phosphatase (InterPro:IPR005135); BEST Arabidopsis thaliana protein match is: DNAse I-like superfamily protein (TAIR:AT1G71710.2); Has 30201 Blast hits to 17322 proteins in 780 species: Archae - 12; Bacteria - 1396; Metazoa - 1…
			GO:0005737 cytoplasm
			GO:0052542 callose deposition during defense response
			GO:0009738 abscisic acid mediated signaling pathway
			GO:0042538 hyperosmotic salinity response
			GO:0046855 inositol phosphate dephosphorylation
			GO:0009753 response to jasmonic acid stimulus
			GO:0004445 inositol-polyphosphate 5-phosphatase activity
			GO:0009611 response to wounding
			GO:0009723 response to ethylene stimulus
			GO:0009733 response to auxin stimulus
			GO:0009845 seed germination
			GO:0009414 response to water deprivation
			GO:0046854 phosphoinositide phosphorylation
		AT5G13180	GO:0010150 leaf senescence	NAC domain containing protein 83 (NAC083); CONTAINS InterPro DOMAIN/s: No apical meristem (NAM) protein (InterPro:IPR003441); BEST Arabidopsis thaliana protein match is: NAC domain containing protein 41 (TAIR:AT2G33480.1); Has 1807 Blast hits to 1807 proteins in 277 species: Archae - 0; Bacteria - 0; Metazoa - 736; Fungi - 347; Plants - 385; Viruses - 0; Other Eukaryotes - 339 (source: NCBI BLink…
			GO:0009737 response to abscisic acid stimulus
			GO:0010363 regulation of plant-type hypersensitive response
			GO:0010089 xylem development
			GO:0009741 response to brassinosteroid stimulus
			GO:0003700 transcription factor activity
			GO:0005634 nucleus
			GO:0006612 protein targeting to membrane
			GO:0009963 positive regulation of flavonoid biosynthetic process
			GO:0045892 negative regulation of transcription, DNA-dependent
			GO:0005515 protein binding
			GO:0009651 response to salt stress
		AT1G03220	GO:0005794 Golgi apparatus	Eukaryotic aspartyl protease family protein; FUNCTIONS IN: aspartic-type endopeptidase activity; INVOLVED IN: response to salt stress; LOCATED IN: cell wall, plasma membrane, membrane, plant-type cell wall; EXPRESSED IN: 6 plant structures; CONTAINS InterPro DOMAIN/s: Peptidase aspartic (InterPro:IPR021109), Peptidase aspartic, catalytic (InterPro:IPR009007), Peptidase A1 (InterPro:IPR001461); BE…
			GO:0005576 extracellular region
			GO:0004190 aspartic-type endopeptidase activity
			GO:0009651 response to salt stress
			GO:0006508 proteolysis
			GO:0009505 plant-type cell wall
			GO:0009506 plasmodesma
		AT5G35750	GO:0018106 peptidyl-histidine phosphorylation	histidine kinase 2 (HK2); FUNCTIONS IN: osmosensor activity, cytokinin receptor activity, protein histidine kinase activity; INVOLVED IN: in 8 processes; LOCATED IN: membrane; EXPRESSED IN: 23 plant structures; EXPRESSED DURING: 13 growth stages; CONTAINS InterPro DOMAIN/s: Signal transduction histidine kinase, homodimeric (InterPro:IPR009082), CHASE (InterPro:IPR006189), Signal transduction hist…
			GO:0031537 regulation of anthocyanin metabolic process
			GO:0010029 regulation of seed germination
			GO:0009414 response to water deprivation
			GO:0043424 protein histidine kinase binding
			GO:0009651 response to salt stress
			GO:0009736 cytokinin mediated signaling pathway
			GO:0010087 phloem or xylem histogenesis
			GO:0000160 two-component signal transduction system (phosphorelay)
			GO:0009636 response to toxin
			GO:0010271 regulation of chlorophyll catabolic process
			GO:0005034 osmosensor activity
			GO:0070417 cellular response to cold
			GO:0071215 cellular response to abscisic acid stimulus
			GO:0009909 regulation of flower development
			GO:0042802 identical protein binding
			GO:0009884 cytokinin receptor activity
			GO:0005886 plasma membrane
			GO:0034757 negative regulation of iron ion transport
			GO:0080117 secondary growth
			GO:0000155 two-component sensor activity
			GO:0000156 two-component response regulator activity
			GO:0006355 regulation of transcription, DNA-dependent
			GO:0005524 ATP binding
			GO:0048831 regulation of shoot development
			GO:0048509 regulation of meristem development
		AT5G24090	GO:0043169 cation binding	chitinase A (CHIA); FUNCTIONS IN: cation binding, hydrolase activity, hydrolyzing O-glycosyl compounds, catalytic activity; INVOLVED IN: response to salt stress, response to cold, cellular response to water deprivation, response to wounding, response to light intensity; LOCATED IN: endomembrane system; EXPRESSED IN: 20 plant structures; EXPRESSED DURING: 13 growth stages; CONTAINS InterPro DOMAIN…
			GO:0005975 carbohydrate metabolic process
			GO:0050665 hydrogen peroxide biosynthetic process
			GO:0004553 hydrolase activity, hydrolyzing O-glycosyl compounds
			GO:0009611 response to wounding
			GO:0009409 response to cold
			GO:0005576 extracellular region
			GO:0010228 vegetative to reproductive phase transition of meristem
			GO:0016926 protein desumoylation
			GO:0009651 response to salt stress
			GO:0042631 cellular response to water deprivation
			GO:0009642 response to light intensity
		AT1G52890	GO:0009733 response to auxin stimulus	NAC domain containing protein 19 (NAC019); CONTAINS InterPro DOMAIN/s: No apical meristem (NAM) protein (InterPro:IPR003441); BEST Arabidopsis thaliana protein match is: NAC domain containing protein 3 (TAIR:AT3G15500.1); Has 3041 Blast hits to 3033 proteins in 75 species: Archae - 0; Bacteria - 0; Metazoa - 0; Fungi - 0; Plants - 3041; Viruses - 0; Other Eukaryotes - 0 (source: NCBI BLink).
			GO:0010286 heat acclimation
			GO:0042538 hyperosmotic salinity response
			GO:0010363 regulation of plant-type hypersensitive response
			GO:0009863 salicylic acid mediated signaling pathway
			GO:0005634 nucleus
			GO:0006612 protein targeting to membrane
			GO:0009867 jasmonic acid mediated signaling pathway
			GO:0009611 response to wounding
			GO:0009723 response to ethylene stimulus
			GO:0003700 transcription factor activity
			GO:0006355 regulation of transcription, DNA-dependent
			GO:0005515 protein binding
			GO:0009414 response to water deprivation
			GO:0009409 response to cold
			GO:0009738 abscisic acid mediated signaling pathway
			GO:0007275 multicellular organismal development
		AT3G18060	GO:0007033 vacuole organization	transducin family protein / WD-40 repeat family protein; FUNCTIONS IN: nucleotide binding; INVOLVED IN: biological_process unknown; LOCATED IN: CUL4 RING ubiquitin ligase complex; EXPRESSED IN: 23 plant structures; EXPRESSED DURING: 14 growth stages; CONTAINS InterPro DOMAIN/s: WD40 repeat 2 (InterPro:IPR019782), WD40 repeat, conserved site (InterPro:IPR019775), WD40 repeat (InterPro:IPR001680), …
			GO:0009832 plant-type cell wall biogenesis
			GO:0048767 root hair elongation
			GO:0009750 response to fructose stimulus
			GO:0080008 CUL4 RING ubiquitin ligase complex
			GO:0030243 cellulose metabolic process
			GO:0005829 cytosol
			GO:0006816 calcium ion transport
			GO:0000166 nucleotide binding
			GO:0006833 water transport
			GO:0009651 response to salt stress
			GO:0007030 Golgi organization
		AT2G38170	GO:0015085 calcium ion transmembrane transporter activity	cation exchanger 1 (CAX1); FUNCTIONS IN: calcium:cation antiporter activity, calcium ion transmembrane transporter activity, calcium:hydrogen antiporter activity; INVOLVED IN: cold acclimation, response to salt stress, cellular zinc ion homeostasis, cellular manganese ion homeostasis, calcium ion transport; LOCATED IN: plant-type vacuole membrane, vacuolar membrane, vacuole, membrane; EXPRESSED I…
			GO:0007030 Golgi organization
			GO:0009624 response to nematode
			GO:0009750 response to fructose stimulus
			GO:0019761 glucosinolate biosynthetic process
			GO:0030026 cellular manganese ion homeostasis
			GO:0016021 integral to membrane
			GO:0009631 cold acclimation
			GO:0006816 calcium ion transport
			GO:0006882 cellular zinc ion homeostasis
			GO:0009705 plant-type vacuole membrane
			GO:0055062 phosphate ion homeostasis
			GO:0006833 water transport
			GO:0005515 protein binding
			GO:0015369 calcium:hydrogen antiporter activity
			GO:0009651 response to salt stress
			GO:0044242 cellular lipid catabolic process
			GO:0009507 chloroplast
			GO:0055085 transmembrane transport
			GO:0032880 regulation of protein localization
		AT2G34720	GO:0009733 response to auxin stimulus	nuclear factor Y, subunit A4 (NF-YA4); CONTAINS InterPro DOMAIN/s: CCAAT-binding transcription factor, subunit B (InterPro:IPR001289), CCAAT-binding factor, conserved site (InterPro:IPR018362); BEST Arabidopsis thaliana protein match is: nuclear factor Y, subunit A7 (TAIR:AT1G30500.2); Has 682 Blast hits to 682 proteins in 159 species: Archae - 0; Bacteria - 0; Metazoa - 143; Fungi - 131; Plants …
			GO:0009751 response to salicylic acid stimulus
			GO:0016602 CCAAT-binding factor complex
			GO:0009753 response to jasmonic acid stimulus
			GO:0010264 myo-inositol hexakisphosphate biosynthetic process
			GO:0003700 transcription factor activity
			GO:0009739 response to gibberellin stimulus
			GO:0009737 response to abscisic acid stimulus
			GO:0009813 flavonoid biosynthetic process
			GO:0009723 response to ethylene stimulus
			GO:0048510 regulation of timing of transition from vegetative to reproductive phase
			GO:0009411 response to UV
			GO:0045892 negative regulation of transcription, DNA-dependent
			GO:0046686 response to cadmium ion
			GO:0009651 response to salt stress
		AT4G32150	GO:0006598 polyamine catabolic process	vesicle-associated membrane protein 711 (VAMP711); INVOLVED IN: intermembrane transport, response to salt stress, cellular membrane fusion, response to abscisic acid stimulus, stomatal movement; LOCATED IN: vacuolar membrane, plasma membrane, vacuole, membrane; EXPRESSED IN: 24 plant structures; EXPRESSED DURING: 15 growth stages; CONTAINS InterPro DOMAIN/s: Longin (InterPro:IPR010908), Longin-li…
			GO:0009737 response to abscisic acid stimulus
			GO:0010363 regulation of plant-type hypersensitive response
			GO:0048193 Golgi vesicle transport
			GO:0046909 intermembrane transport
			GO:0006612 protein targeting to membrane
			GO:0006816 calcium ion transport
			GO:0009963 positive regulation of flavonoid biosynthetic process
			GO:0006944 cellular membrane fusion
			GO:0005886 plasma membrane
			GO:0046686 response to cadmium ion
			GO:0009651 response to salt stress
			GO:0005774 vacuolar membrane
			GO:0007030 Golgi organization
			GO:0010118 stomatal movement
		AT5G52660	GO:0009737 response to abscisic acid stimulus	Homeodomain-like superfamily protein; CONTAINS InterPro DOMAIN/s: SANT, DNA-binding (InterPro:IPR001005), Homeodomain-like (InterPro:IPR009057), Myb, DNA-binding (InterPro:IPR014778), HTH transcriptional regulator, Myb-type, DNA-binding (InterPro:IPR017930), Myb-like DNA-binding domain, SHAQKYF class (InterPro:IPR006447); BEST Arabidopsis thaliana protein match is: Homeodomain-like superfamily pr…
			GO:0009753 response to jasmonic acid stimulus
			GO:0003700 transcription factor activity
			GO:0005634 nucleus
			GO:0009751 response to salicylic acid stimulus
			GO:0006355 regulation of transcription, DNA-dependent
			GO:0046686 response to cadmium ion
			GO:0009651 response to salt stress
			GO:0009723 response to ethylene stimulus
			GO:0009739 response to gibberellin stimulus
		AT5G59780	GO:0009733 response to auxin stimulus	myb domain protein 59 (MYB59); FUNCTIONS IN: DNA binding, sequence-specific DNA binding transcription factor activity; INVOLVED IN: in 7 processes; LOCATED IN: nucleus; EXPRESSED IN: 20 plant structures; EXPRESSED DURING: 9 growth stages; CONTAINS InterPro DOMAIN/s: SANT, DNA-binding (InterPro:IPR001005), Homeodomain-like (InterPro:IPR009057), Myb, DNA-binding (InterPro:IPR014778), HTH transcript…
			GO:0009737 response to abscisic acid stimulus
			GO:0010200 response to chitin
			GO:0009753 response to jasmonic acid stimulus
			GO:0003700 transcription factor activity
			GO:0005634 nucleus
			GO:0009751 response to salicylic acid stimulus
			GO:0006355 regulation of transcription, DNA-dependent
			GO:0046686 response to cadmium ion
			GO:0009651 response to salt stress
			GO:0009723 response to ethylene stimulus
			GO:0009739 response to gibberellin stimulus
		AT5G14200	GO:0019761 glucosinolate biosynthetic process	isopropylmalate dehydrogenase 1 (IMD1); FUNCTIONS IN: 3-isopropylmalate dehydrogenase activity; INVOLVED IN: glucosinolate biosynthetic process, leucine biosynthetic process, response to salt stress, metabolic process; LOCATED IN: chloroplast, chloroplast stroma, plastid; EXPRESSED IN: root, leaf; EXPRESSED DURING: seedling growth; CONTAINS InterPro DOMAIN/s: Isopropylmalate dehydrogenase (InterP…
			GO:0009570 chloroplast stroma
			GO:0000287 magnesium ion binding
			GO:0009098 leucine biosynthetic process
			GO:0051287 NAD or NADH binding
			GO:0009651 response to salt stress
			GO:0003862 3-isopropylmalate dehydrogenase activity
			GO:0055114 oxidation reduction
		AT2G46680	GO:0043565 sequence-specific DNA binding	homeobox 7 (HB-7); FUNCTIONS IN: transcription activator activity, sequence-specific DNA binding transcription factor activity; INVOLVED IN: response to water deprivation, abscisic acid mediated signaling pathway, regulation of transcription, DNA-dependent, response to abscisic acid stimulus; LOCATED IN: nucleus; EXPRESSED IN: 21 plant structures; EXPRESSED DURING: 6 growth stages; CONTAINS Inter…
			GO:0042538 hyperosmotic salinity response
			GO:0003700 transcription factor activity
			GO:0005634 nucleus
			GO:0009738 abscisic acid mediated signaling pathway
			GO:0045893 positive regulation of transcription, DNA-dependent
			GO:0009414 response to water deprivation
			GO:0009409 response to cold
		AT3G04720	GO:0010167 response to nitrate	pathogenesis-related 4 (PR4); FUNCTIONS IN: chitin binding; INVOLVED IN: in 6 processes; LOCATED IN: endomembrane system; EXPRESSED IN: 20 plant structures; EXPRESSED DURING: 10 growth stages; CONTAINS InterPro DOMAIN/s: Barwin (InterPro:IPR001153), Glycoside hydrolase, family 19, catalytic (InterPro:IPR000726), Barwin-related endoglucanase (InterPro:IPR009009), Chitin-binding, type 1, conserved …
			GO:0015706 nitrate transport
			GO:0016998 cell wall macromolecule catabolic process
			GO:0009615 response to virus
			GO:0004540 ribonuclease activity
			GO:0080027 response to herbivore
			GO:0009627 systemic acquired resistance
			GO:0009723 response to ethylene stimulus
			GO:0005576 extracellular region
			GO:0008061 chitin binding
			GO:0009817 defense response to fungus, incompatible interaction
			GO:0009651 response to salt stress
			GO:0042742 defense response to bacterium
		AT1G01060	GO:0009733 response to auxin stimulus	LATE ELONGATED HYPOCOTYL (LHY); CONTAINS InterPro DOMAIN/s: SANT, DNA-binding (InterPro:IPR001005), Homeodomain-like (InterPro:IPR009057), Myb, DNA-binding (InterPro:IPR014778), HTH transcriptional regulator, Myb-type, DNA-binding (InterPro:IPR017930), Myb-like DNA-binding domain, SHAQKYF class (InterPro:IPR006447); BEST Arabidopsis thaliana protein match is: circadian clock associated 1 (TAIR:AT…
			GO:0044212 DNA regulatory region binding
			GO:0009639 response to red or far red light
			GO:0009751 response to salicylic acid stimulus
			GO:0009753 response to jasmonic acid stimulus
			GO:0048574 long-day photoperiodism, flowering
			GO:0003700 transcription factor activity
			GO:0005634 nucleus
			GO:0009737 response to abscisic acid stimulus
			GO:0009723 response to ethylene stimulus
			GO:0006355 regulation of transcription, DNA-dependent
			GO:0042754 negative regulation of circadian rhythm
			GO:0046686 response to cadmium ion
			GO:0009409 response to cold
			GO:0009651 response to salt stress
			GO:0043433 negative regulation of transcription factor activity
			GO:0009739 response to gibberellin stimulus
